# Supplementary material for: Highly selective photocatalytic CO2reductionviaa lead-free perovskite/MOF catalyst
Source: Royal Society of Chemistry journal article supplement (doi:10.1039/d2ta09777j), 2023-01-01
Supplement: d2ta09777j1.pdf [file d2ta09777j1.pdf]

## Supporting Information

### Highly selective Photocatalytic CO<sub>2</sub> Reduction via a Lead-free Perovskite/MOF Catalyst

Na Li, Xin-Ping Zhai, Bo Ma, Hui-Jie Zhang, Ming-Jun Xiao, Qiang Wang,\* Hao-Li Zhang\*

State Key Laboratory of Applied Organic Chemistry (SKLAOC), Key Laboratory of Advanced Catalysis of Gansu Province, College of Chemistry and Chemical Engineering, Key Laboratory of Special Function Materials and Structure Design, Ministry of Education, Lanzhou University, Lanzhou, 730000, China.

**Correspondence authors:**

qiangwang@lzu.edu.cn (Q.W.); haoli.zhang@lzu.edu.cn (H.-L.Z.)

## 1. Experimental Section

### 1.1 Materials: Chemicals

CsBr and BiBr<sub>3</sub> were purchased from Aladdin Chemistry Co. Ltd. tetrakis(4-carboxyphenyl)porphyrin and Zirconyl chloride octahydrate were purchased from Aladdin Chemistry Co. Ltd. Dimethyl sulfoxide (DMSO) was from Tianjin Rianlon Corporation Pharmaceutical & Chemical Co. Ltd. isopropanol was from Guangdong Fine Chemicals Engineering Technology Research Center Co. Ltd. All solvents and chemicals were used without any further purification. Deionized water with resistivity of 18.3 MΩ•cm was used to prepare aqueous solution throughout the experiment.

### 2. Photoelectrochemical Measurements

Photocurrent measurements were performed using a standard three-electrode cell with the as-prepared sample films as the working electrode, a platinum foil as the counter electrode, and a saturated Ag/AgCl as the reference electrode. 0.05 M tetrabutylammonium hexafluorophosphate (TBAPF<sub>6</sub>)/ethyl acetate solution was filled in the quartz cell as the electrolyte. The photocurrents were recorded on a Zennium electrochemical workstation (Zahner) under irradiation of a 300 W Xe lamp (AM1.5G, and 100 mW•cm<sup>-2</sup>) at open circuit voltage.

### 3 Characterization methods

#### *Spectroscopic measurement*

The UV/Vis absorption spectra were obtained on a TU-1810 Spectrophotometer (Beijing Purkinje General Instrument, China). FTIR spectra were collected on a VERTEX 70V instrument. Both LS 55 fluorescence spectrometer (Perkin-Elmer) and for the femtosecond broadband pump-probe spectroscopy, the laser source was a Coherent Legend Elite regenerative amplifier (1 KHz, 800 nm) that was seeded by a Coherent Chameleon oscillator (110 fs, 80 MHz). Cs<sub>3</sub>Bi<sub>2</sub>Br<sub>9</sub> QDs and Cs<sub>3</sub>Bi<sub>2</sub>Br<sub>9</sub>/MOF-525-Co were respectively drop-casted on quartz glasses as films for the transient

absorption tests. TCPP, MOF525 and MOF 525Co were dispersed in the DMF solvent for testing. All of the measurements were performed at room temperature unless otherwise specified.

#### *Other characterizations*

The TEM micrographs were obtained using Talos F200S Field Emission Transmission Electron Microscopes (FEI, USA) at operating voltages of 200 kV, respectively. Powder X-ray diffraction (XRD) patterns of the products were recorded on a Panalytical X' Pert PRO diffract meter using Cu  $K\alpha$  X-rays between  $5^\circ$  and  $50^\circ$ . X-ray photoelectron spectroscopy (XPS) and ultraviolet photoelectron spectroscopy (UPS) measurements were performed on an AXIS Ultra instrument.

The Co contents of composites were analyzed by inductively coupled plasma optical emission spectrometry (ICP-OES, 5110, Agilent Technologies Inc., USA).

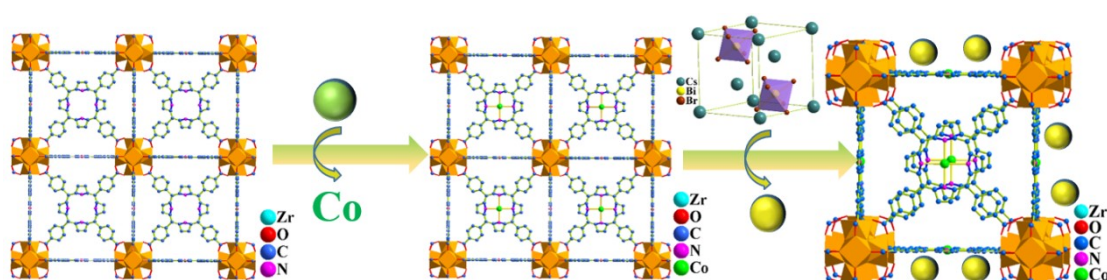

**Scheme S1.** Synthesis of Composite Catalysts  $Cs_3Bi_2Br_9/MOF\ 525\ Co$

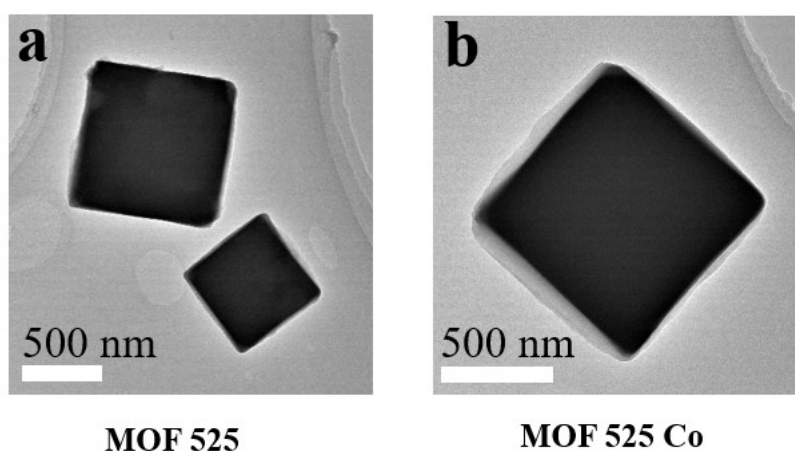

**Fig. S1.** More representative TEM images of (a) MOF525, (b) MOF525Co.

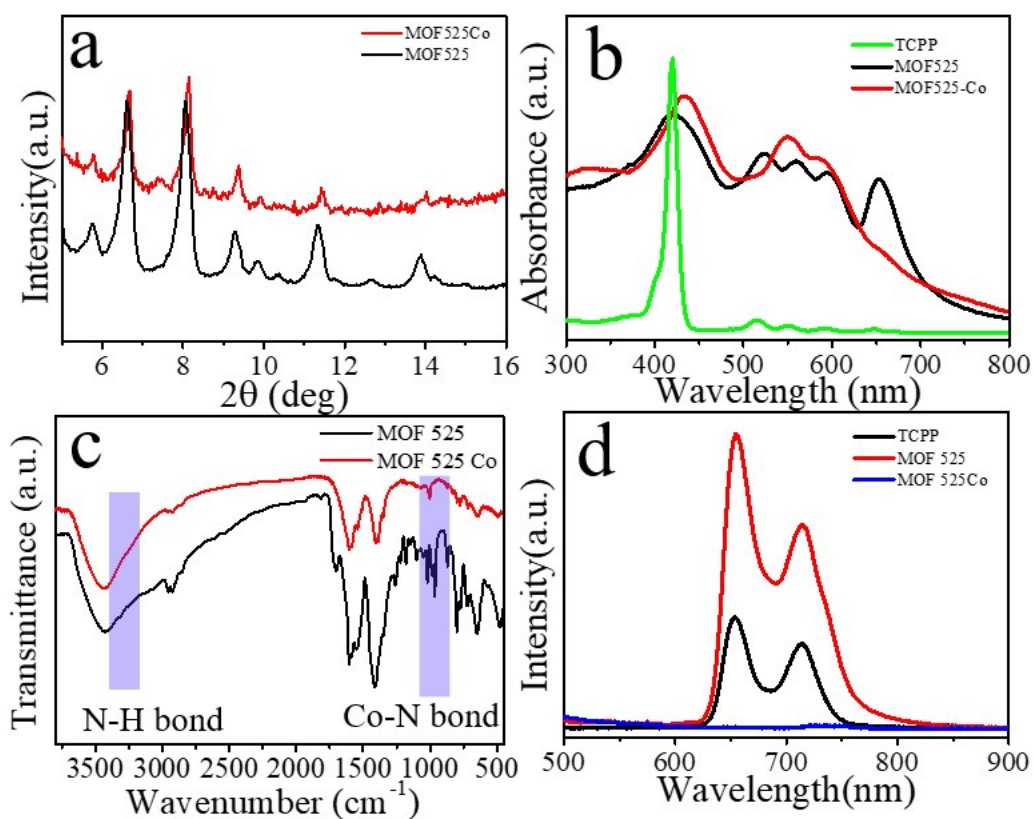

**Fig. S2.** The corresponding XRD patterns (a), UV-Vis spectra (b) and FT-IR spectra (c) of MOF525, MOF525Co, (d) Steady-state PL spectra of the TCP, MOF525 and MOF525Co with an excitation wavelength of 375 nm.

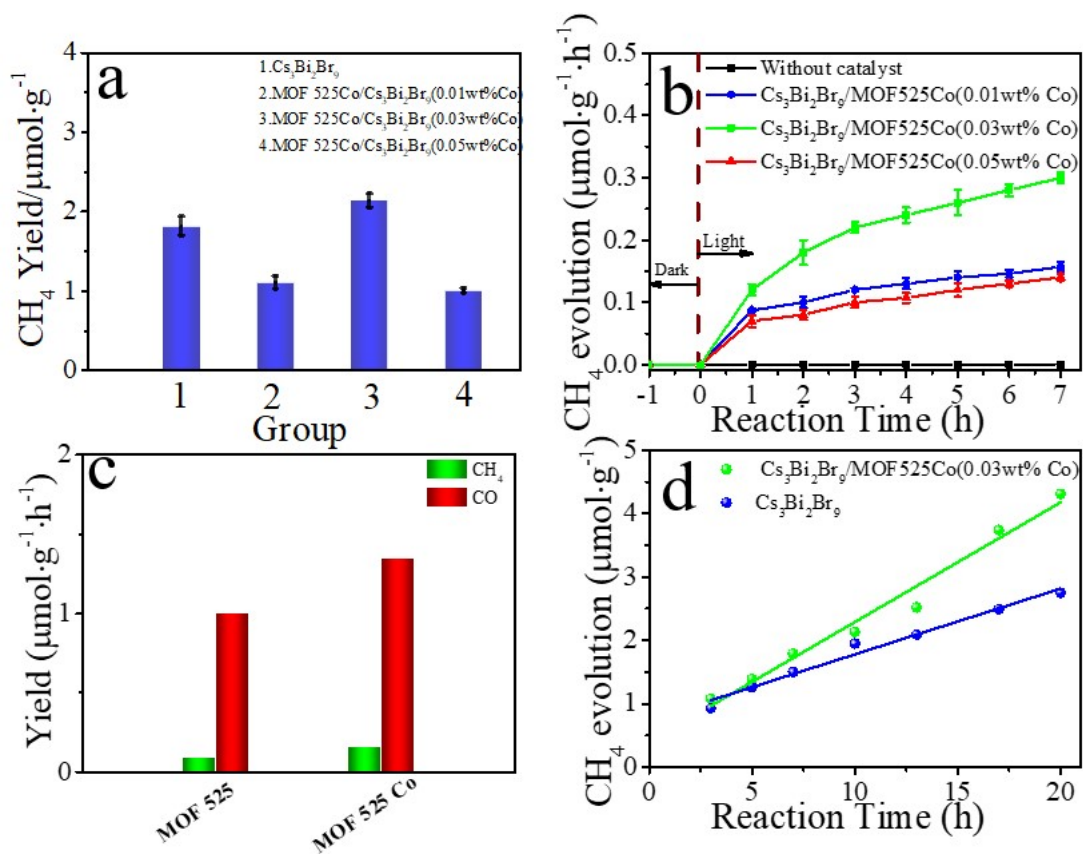

**Fig. S3.** Photocatalytic performance of for CO<sub>2</sub> reduction CH<sub>4</sub> yield (a) using different catalysts; (b) product yields within 7 h, (c) using MOF 525 and MOF525 Co catalysts, (d) Long-time catalytic stability of Cs<sub>3</sub>Bi<sub>2</sub>Br<sub>9</sub> QDs and the Cs<sub>3</sub>Bi<sub>2</sub>Br<sub>9</sub>/MOF 525-Co (0.03 wt% Co).

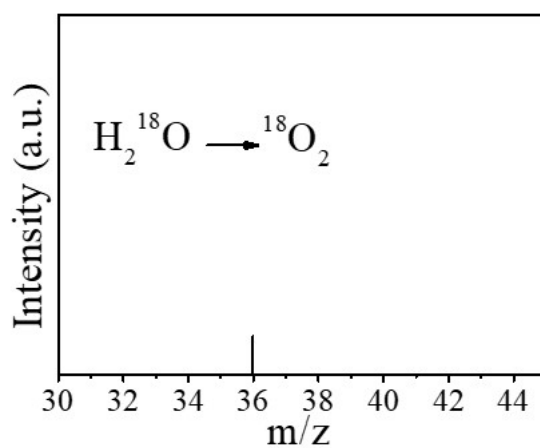

**Fig. S4.** Gas chromatography-mass spectrometric (GC-MS) analysis for solar-driven oxidation of H<sub>2</sub><sup>18</sup>O to <sup>18</sup>O<sub>2</sub> (m/z = 36) using Cs<sub>3</sub>Bi<sub>2</sub>Br<sub>9</sub>/MOF 525-Co (0.03 wt% Co) as a photocatalyst.

## Apparent quantum efficiency (AQE) measurement

The AQE was measured according to the previous reported method.<sup>[1]</sup> We measured the AQE using the same experimental setup, but with 420 nm LED light source to obtain monochromatic light and the equation as follows:

$$AQE(\%) = \frac{\text{Number of reacted electrons } (N_{\text{electron}})}{\text{Number of incident photons } (N_{\text{photon}})} \times 100$$

The calculation of  $N_{\text{electron}}$  is based on the fact that two electrons are required to produce one molecule CO, while 8 electrons for the one molecule CH<sub>4</sub>, according to the equations mentioned in the manuscript. For Cs<sub>3</sub>Bi<sub>2</sub>Br<sub>9</sub>/MOF 525 Co (0.03 wt% Co) catalyst, the CO and CH<sub>4</sub> production were 3.4 μmol and 0.2 μmol with 420 nm monochromatic light.

$$\text{So, } N_{\text{electron}} = 2N(\text{CO}) + 8N(\text{CH}_4) = 2 \times 3.4 \mu\text{mol} + 8 \times 0.2 \mu\text{mol} = 8.4 \mu\text{mol}$$

Number of incident photons are calculated using the following equations:

$$\begin{aligned} N_{\text{photon}} &= \frac{\text{Light intensity} * \text{Illumination area} * \text{Time}}{\text{Average single photon energy} * N_A} \\ &= \\ &= \frac{100 \text{ mw} \cdot \text{cm}^{-2} * 9.62 \text{ cm}^2 * 3600 \text{ s}}{\frac{6.625 \times 10^{-34} \text{ J} \cdot \text{s} * 3 \times 10^{17} \text{ nm} \cdot \text{s}^{-1}}{420 \text{ nm}} * 6.022 \times 10^{23} \text{ mol}^{-1}} = 12155 \mu\text{mol} \end{aligned}$$

where the illumination area is controlled to 9.62 cm<sup>2</sup>,  $N_A$  is the Avogadro constant and the average single photon energy ( $E_{\text{photon}}$ ) is figured out using the equation:  $E_{\text{photon}} = hc/\lambda$ , where  $h$  is the Planck constant,  $c$  indicates speed of light, and  $\lambda$  is the wavelength.

$$\text{Finally, } AQE(\%) = \frac{8.4 \mu\text{mol}}{12155 \mu\text{mol}} \times 100 = 0.07\%$$

Under the same experimental conditions, for Cs<sub>3</sub>Bi<sub>2</sub>Br<sub>9</sub> QDs, the CO and CH<sub>4</sub> production were 2.4 μmol and 0.1 μmol.

Finally,

$$AQE(\%) = \frac{5.6 \mu\text{mol}}{12155 \mu\text{mol}} \times 100 = 0.046\%$$

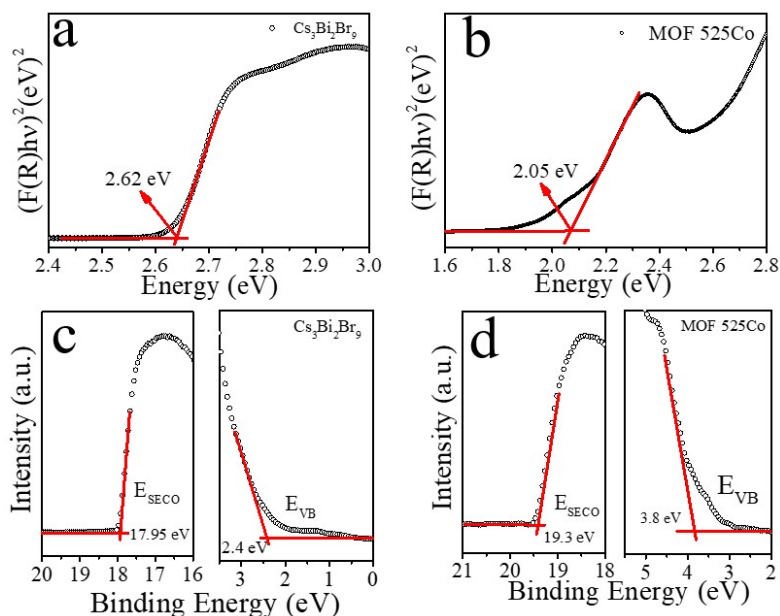

**Fig. S5.** The Tauc plot of  $\text{Cs}_3\text{Bi}_2\text{Br}_9$  QDs (a) and MOF 525 Co (b) The Ultraviolet photoelectron spectra of  $\text{Cs}_3\text{Bi}_2\text{Br}_9$  QDs (c) and MOF 525 Co (d).

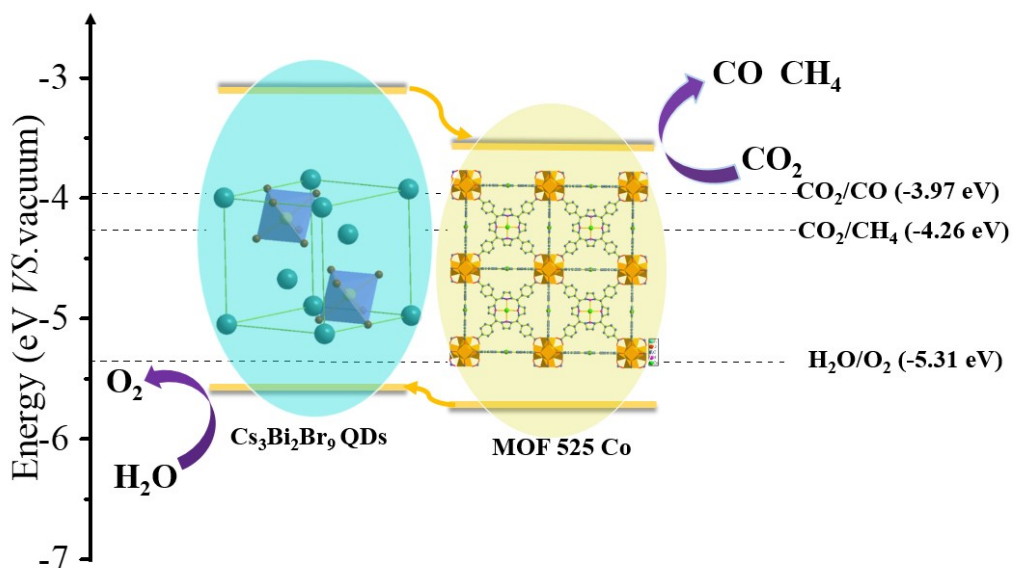

**Fig. S6.** The proposed photocatalytic procedure and electronic bandgap information for the type II heterojunction.

**Table S1.** A summary of the photocatalytic CO<sub>2</sub> reduction performance by metal halide perovskites photocatalysts.

| Photocatalysts                                                                        | Reaction condition                                                | Light source                                       | Products/<br>μmol g <sup>-1</sup> h <sup>-1</sup> | R <sub>electron</sub> /<br>μmol g <sup>-1</sup> h <sup>-1</sup> | CO<br>Selectivity<br>(%) | Ref                                                                |
|---------------------------------------------------------------------------------------|-------------------------------------------------------------------|----------------------------------------------------|---------------------------------------------------|-----------------------------------------------------------------|--------------------------|--------------------------------------------------------------------|
| Cs <sub>3</sub> Bi <sub>2</sub> Br <sub>9</sub> /MOF-525-Co (0.03 wt% Co)             | CO <sub>2</sub> and<br>Water<br>Vapor                             | AM 1.5G, 100<br>mW cm <sup>-2</sup>                | CH <sub>4</sub> : 0.3<br>CO: 61.2                 | 124.8                                                           | 99.5                     | <b>This work</b>                                                   |
| Cs <sub>2</sub> CuBr <sub>4</sub> QDs                                                 | CO <sub>2</sub> and<br>Water<br>Vapor                             | 300W Xe<br>AM1.5G                                  | CH <sub>4</sub> : 14.96<br>CO: 29.8               | 179.29                                                          | 33.4                     | <i>ACS Catal.</i> 2022,<br>12, 2915-2926                           |
| Cs <sub>3</sub> Bi <sub>2</sub> I <sub>9</sub> QDs                                    | Gas<br>(CO <sub>2</sub> +H <sub>2</sub> O)                        | 32 W UV Lamp<br>305 nm<br>80.38 μW/cm <sup>2</sup> | CO: 7.8<br>CH <sub>4</sub> : 1.5                  | 27.6                                                            | 83.8                     | <i>J. Am. Chem. Soc.</i> ,<br>2019, 141, 20434-<br>20442.          |
| M <sub>A3</sub> Bi <sub>2</sub> I <sub>9</sub> QDs                                    | Gas<br>(CO <sub>2</sub> +H <sub>2</sub> O)                        | 32 W UV Lamp<br>305 nm<br>80.38 μW/cm <sup>2</sup> | CO: 0.7<br>CH <sub>4</sub> : 1.0                  | 9.4                                                             | 41                       | <i>J. Am. Chem. Soc.</i> ,<br>2019, 141, 20434-<br>20442.          |
| Rb <sub>3</sub> Bi <sub>2</sub> I <sub>9</sub> QDs                                    | Gas<br>(CO <sub>2</sub> +H <sub>2</sub> O)                        | 32 W UV Lamp<br>305 nm<br>80.38 μW/cm <sup>2</sup> | CO: 1.8<br>CH <sub>4</sub> : 1.7                  | 17.2                                                            | 51                       | <i>J. Am. Chem. Soc.</i> ,<br>2019, 141, 20434-<br>20442.          |
| Cs <sub>3</sub> Bi <sub>2</sub> I <sub>9</sub> QDs                                    | Toluene                                                           | 300 W Xe lamp<br>AM1.5G                            | CO: 1.1                                           | 2.2                                                             | 100                      | <i>ACS Nano</i> 2020, 14,<br>13103-13114                           |
| Cs <sub>3</sub> Bi <sub>2</sub> Br <sub>9</sub> QDs                                   | Toluene                                                           | 300 W Xe lamp<br>AM1.5G                            | CO: 26.9                                          | 53.8                                                            | 100                      | <i>ACS Nano</i> 2020, 14,<br>13103-13114                           |
| Cs <sub>3</sub> Bi <sub>2</sub> Cl <sub>9</sub> QDs                                   | Toluene                                                           | 300 W Xe lamp<br>AM1.5G                            | CO: 16.6                                          | 33.2                                                            | 100                      | <i>ACS Nano</i> 2020, 14,<br>13103-13114                           |
| Cs <sub>3</sub> Bi <sub>2</sub> Br <sub>9</sub> @M-Ti                                 | Isopropanol                                                       | 300 W Xe lamp,<br>70 mW·cm <sup>-2</sup>           | CH <sub>4</sub> : 28.8<br>CO: 4.84                | 240.08                                                          | 85.6                     | <i>Angew. Chem. Int.<br/>Ed.</i> , 2022, 61,<br>e202200872.        |
| In <sub>4</sub> SnS <sub>8</sub> /<br>Cs <sub>3</sub> Bi <sub>2</sub> Br <sub>9</sub> | Gas-solid<br>reactor                                              | 300 W Xe lamp<br>>420 nm                           | CO: 9.55                                          | 19.1                                                            | 100                      | <i>Applied Catalysis B:<br/>Environmental</i> 313<br>(2022) 121426 |
| Cs <sub>3</sub> Bi <sub>2</sub> I <sub>9</sub> /CeO <sub>2</sub>                      | Gas<br>(CO <sub>2</sub> +H <sub>2</sub> O)                        | 300 W Xe lamp<br>100 mW/cm <sup>2</sup>            | CH <sub>4</sub> : 5.8<br>CO: 14                   | 74                                                              | 70.7                     | <i>J. Energy Chem.</i> ,<br>2022, 69, 348-355.                     |
| Cs <sub>2</sub> SnI <sub>6</sub> /SnS <sub>2</sub>                                    | Gas<br>(CO <sub>2</sub> +H <sub>2</sub> O+<br>CH <sub>3</sub> OH) | 100 W Xe lamp<br>>400 nm<br>150 mW/cm <sup>2</sup> | CH <sub>4</sub> : 2.0                             | 16.0                                                            | 0                        | <i>J. Am. Chem. Soc.</i><br>2019, 141, 13434-<br>13441             |
| Cs <sub>3</sub> Bi <sub>2</sub> I <sub>9</sub> /Bi <sub>2</sub> WO <sub>6</sub>       | Gas                                                               | 300 W Xe lamp                                      | CO: 7.3                                           | 14.6                                                            | 100                      |                                                                    |



|                                                                         |                                            |                                   |                                      |        |     |                                                                       |
|-------------------------------------------------------------------------|--------------------------------------------|-----------------------------------|--------------------------------------|--------|-----|-----------------------------------------------------------------------|
|                                                                         | (CO <sub>2</sub> +H <sub>2</sub> O)        | 100 mW/cm <sup>2</sup>            |                                      |        |     | <i>Sol. RRL</i> , 2021, 5, 2000691.                                   |
| Cs <sub>2</sub> AgBiBr <sub>6</sub> NC                                  | EA                                         | AM 1.5G, 150 mW cm <sup>-2</sup>  | CH <sub>4</sub> : 2.35<br>CO: 1.6    | 22     | 40  | <i>Small</i> 2018, 14, 1703762                                        |
| Cs <sub>2</sub> AgBiI <sub>6</sub>                                      | CO <sub>2</sub> and H <sub>2</sub> O Vapor | 300 W Xe lamp 420nm               | CO: 6.3                              | 12.6   | 100 | <i>Chem. Mater.</i> 2021, 33, 13, 4971–4976                           |
| Cs <sub>2</sub> AgBiCl <sub>6</sub>                                     | CO <sub>2</sub> and H <sub>2</sub> O Vapor | -                                 | CO: 4.54                             | 9.08   | 100 | -                                                                     |
| Cs <sub>2</sub> AgBi(Br <sub>0.5</sub> I <sub>0.5</sub> ) <sub>6</sub>  | CO <sub>2</sub> and H <sub>2</sub> O Vapor | -                                 | CO: 3.96                             | 7.92   | 100 | -                                                                     |
| Cs <sub>2</sub> AgInCl <sub>6</sub> @Ag                                 | EA                                         | 300 W Xe lamp                     | CH <sub>4</sub> : 4.66<br>CO: 4.86   | 47     | 51  | <i>Sustainable Energy &amp; Fuels</i> 2021, 5 (14), 3598-3605         |
| Cs <sub>2</sub> AgBiBr <sub>6</sub> /Ce-UiO-66                          | CO <sub>2</sub> and H <sub>2</sub> O Vapor | 300W Xe AM1.5G                    | CO: 309.01<br>CH <sub>4</sub> : 0.71 | 444.62 | 99  | <i>Chem. Eng. J.</i> , 2022, 446, 137102.                             |
| Cs <sub>2</sub> AgBiBr <sub>6</sub> /Sr <sub>2</sub> FeNbO <sub>6</sub> | EA + Water                                 | 300W Xe Lamp λ <sub>≥</sub> 420nm | CH <sub>4</sub> : 8.12<br>CO: 50     | 164.96 | 86  | <i>Chem. Eng. J.</i> , 2022, 446, 137197                              |
| Cs <sub>2</sub> AgBiBr <sub>6</sub> /Bi <sub>2</sub> WO <sub>6</sub>    | EA+ Isopropanol                            | 300W Xe Lamp                      | CH <sub>4</sub> : 0.41<br>CO: 42.19  | 87.66  | 99  | <i>Journal of Colloid and Interface Science</i> , 2023, 629, 233-242. |
| Cs <sub>2</sub> NaBiCl <sub>6</sub>                                     | CO <sub>2</sub> and H <sub>2</sub> O Vapor | 300W Xe Lamp                      | CH <sub>4</sub> : 1.2<br>CO: 30      | 69.4   | 96  | <i>Adv. Energy Mater.</i> 2022, 2202074                               |

The catalytic performances of samples were calculated according to the total weight of materials.

The electron consumption yield was calculated with the following equation:

$$Yield_{electron} = 2Yield_{CO} + 8Yield_{CH_4}$$

The CO selectivity was calculated from the product yield as follows:

CO selectivity =  $R(CO)/[R(CO) + R(CH_4)] \times 100\%$ , where  $R_{CO}$  and  $R_{CH_4}$  represent the production rates of CO and CH<sub>4</sub>, respectively.

**Table S2.** Fitted TA lifetimes of the Cs<sub>3</sub>Bi<sub>2</sub>Br<sub>9</sub> QDs and Cs<sub>3</sub>Bi<sub>2</sub>Br<sub>9</sub>/MOF 525-Co

| Sample                                                      | Wavelength(nm) | τ <sub>1</sub> (A <sub>1</sub> ) | τ <sub>2</sub> (A <sub>2</sub> ) | τ <sub>3</sub> (A <sub>3</sub> ) |
|-------------------------------------------------------------|----------------|----------------------------------|----------------------------------|----------------------------------|
| Cs <sub>3</sub> Bi <sub>2</sub> Br <sub>9</sub> QDs         | 455 nm         | 2.9 ps (55.7%)                   | 45.9 ps (29%)                    | 13 ns (15.3%)                    |
| Cs <sub>3</sub> Bi <sub>2</sub> Br <sub>9</sub> /MOF 525-Co | 450 nm         | 2.6 ps (70.3%)                   | 34.3 ps (21.4%)                  | 7.5 ns (8.3%)                    |
| Cs <sub>3</sub> Bi <sub>2</sub> Br <sub>9</sub> QDs         | 468 nm         | 8.0 ps (49.3%)                   | 40.6 ps (22.4%)                  | 15.9 ns (28.3%)                  |
| Cs <sub>3</sub> Bi <sub>2</sub> Br <sub>9</sub> /MOF 525-Co | 471 nm         | 9.1 ps (84.3%)                   | 22.3 ps (3.9%)                   | 12.6 ns (11.8%)                  |

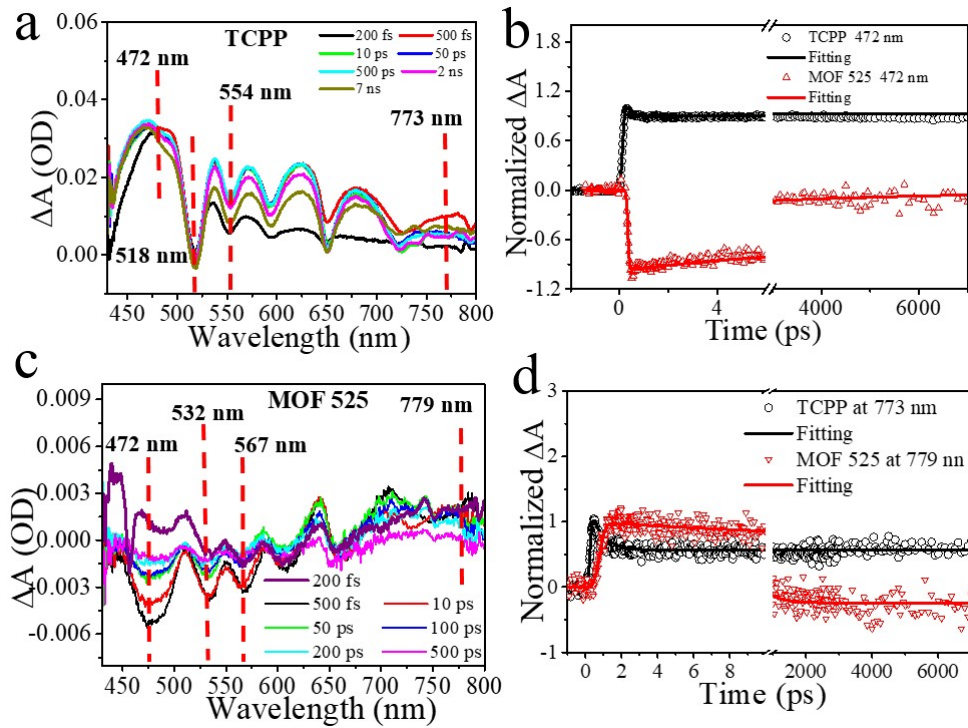

**Fig. S7.** Representative spectra at different delay time for TCP(a) and MOF 525 (c) in the range of 200 fs-5 ns excited at 400 nm. Decay curves are normalized to the maximum signals at wavelengths of  $\sim 472$  nm (b) and  $\sim 770$  nm (d).

**Table S3.** Fitted lifetime components of TCP and MOF 525.

| Sample  | Wavelength(nm)   | $\tau_1(A_1)$   | $\tau_2(A_2)$   | $\tau_3(A_3)$ |
|---------|------------------|-----------------|-----------------|---------------|
| MOF 525 | 472 nm (S band)  | 7.1 ps (26.1%)  | 133 ps (50.2%)  | >ns (23.7%)   |
| TCP     | 472 nm (S band)  | 124 fs (37.6%)  |                 | >ns (62.4%)   |
| MOF 525 | 532 nm (Q1 band) | 15.6 ps (31.2%) | 156 ps (40.4%)  | >ns (28.4%)   |
| TCP     | 518 nm (Q1 band) | 10.7 ps (7.9%)  | 4.0 ns (-39.6%) | >ns (52.5%)   |
| MOF 525 | 567 nm (Q2 band) | 8.9 ps (24.7%)  | 111 ps (42.3%)  | >ns (33%)     |
| TCP     | 554 nm (Q2 band) |                 |                 | >ns (100%)    |
| MOF 525 | 779 nm           | 21.1 ps (22.2%) | 466 ps (61.3%)  | >ns (16.5%)   |

|      |        |                |             |
|------|--------|----------------|-------------|
| TCPP | 773 nm | 742 fs (52.1%) | >ns (47.9%) |
|------|--------|----------------|-------------|

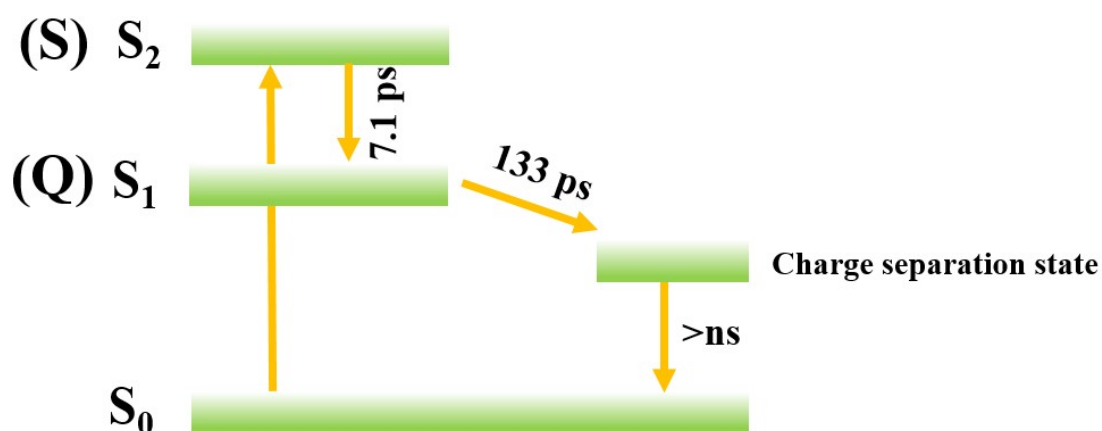

**Fig. S8.** Proposed dynamic steps within MOF525 upon photoexcitation. Herein the fitted lifetime at 472 nm (S band) at the 472 nm is taken as an example.

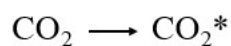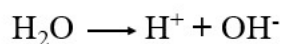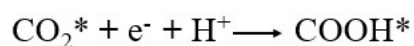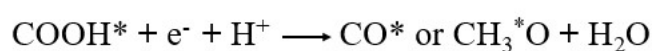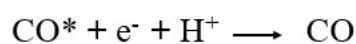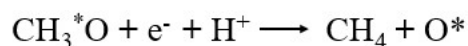

**Scheme S2.** The conversion process of photocatalytic  $\text{CO}_2$  reduction<sup>[2]</sup>

## References

[1] Fang, Z.-B.; Liu, T.-T.; Liu, J.; Jin, S.; Wu, X.-P.; Gong, X.-Q.; Wang, K.; Yin, Q.; Liu, T.-F.; Cao, R.; Zhou, H.-C., Boosting Interfacial Charge-Transfer Kinetics for Efficient Overall  $\text{CO}_2$  Photoreduction via Rational Design of Coordination Spheres on Metal–Organic Frameworks. *J. Am. Chem. Soc.* **2020**, *142* (28), 12515-12523.

[2] Ding, L.; Bai, F.; Borjigin, B.; Li, Y.; Li, H.; Wang, X., Embedding  $\text{Cs}_2\text{AgBiBr}_6$  QDs into Ce-UiO-66-H to in situ construct a novel bifunctional material for capturing and photocatalytic reduction of  $\text{CO}_2$ . *Chem. Eng. J.* **2022**, *446*, 137102.
